# Supplementary material
Source: PubMed Central journal article supplement (PMC4962618)
Supplement: NIHMS804231-supplement-Supp_Info.pdf [file NIHMS804231-supplement-Supp_Info.pdf]

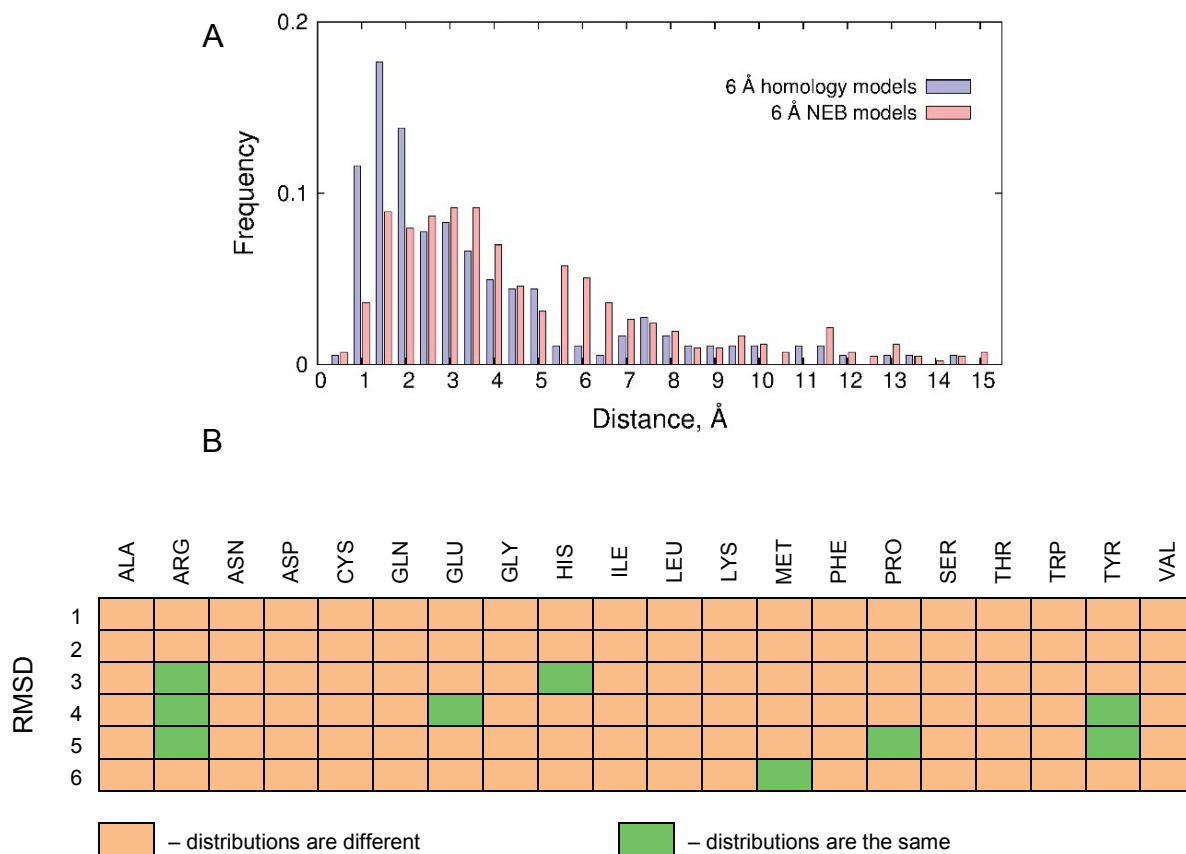

**Figure S1.** Deviation of  $C^\alpha$  positions in models. The deviation is calculated from the corresponding X-ray structures, with models and the X-ray structures superimposed by minimizing RMSD. (A) Histidines in 6 Å models. (B) Comparison of homology and NEB models.

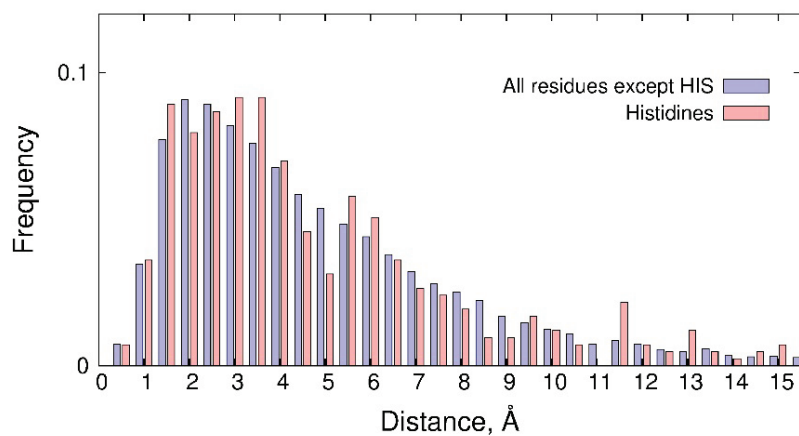

**Figure S2.** Deviation of  $C^\alpha$  positions in histidines and all other residues in 6 Å NEB models.
